# Supplementary material for: PEG-modified upconversion nanoparticles for in vivo optical imaging of tumors
Source: Royal Society of Chemistry journal article supplement (doi:10.1039/c5ra25304g), 2016-01-01
Supplement: c5ra25304g1.pdf [file c5ra25304g1.pdf]

## Supplementary Material

### PEG-modified upconversion nanoparticles for *in vivo* optical imaging of tumors

A.N. Generalova,<sup>a,b\*</sup> V.V. Rocheva,<sup>a</sup> A.V. Nechaev,<sup>a,c</sup> D.A. Khochenkov,<sup>d</sup> N.V. Sholina,<sup>a,d</sup>  
V.A. Semchishen,<sup>a</sup> V.P. Zubov,<sup>b</sup> A.V. Koroleva,<sup>e</sup> B.N. Chichkov<sup>e</sup> and E.V. Khaydukov<sup>a</sup>

<sup>a</sup> Institute on Laser and Information Technologies of the Russian Academy of Sciences, 140700, Shatura, Russia;

<sup>b</sup> M.M. Shemyakin & Yu.A. Ovchinnikov Institute of Bioorganic Chemistry of the Russian Academy of Sciences, 117997, Moscow, Russia;

<sup>c</sup> M.V. Lomonosov Moscow State University of Fine Chemical Technology, 119571, Moscow, Russia;

<sup>d</sup> Federal State Scientific Institution N.N. Blokhin Russian Cancer Research Center, 115478, Moscow, Russia;

<sup>e</sup> Laser Zentrum Hannover, 30419, Hannover, Germany.

**Supplementary Information 1 (SI-1).** Colloid stability of modified UCNPs in a PBS buffer, pH 7.0, was confirmed by dynamic light scattering (DLS) measurements. No significant differences in sizes of modified UCNPs was observed over 2 months (Fig. SI-1)

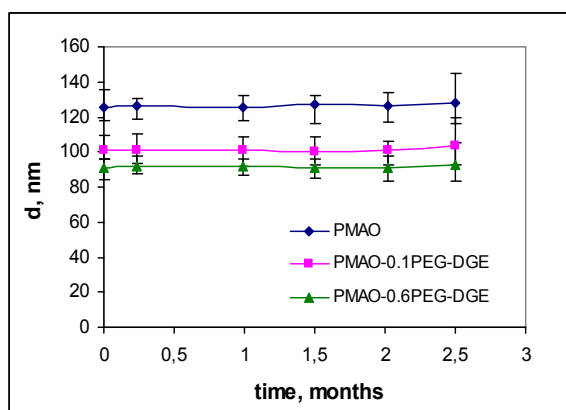

Fig. SI-1. Diameters of UCNPs modified with PMAO and with PMAO followed by PEG-DGE cross-linking at 0.1 and 0.6 mg/ml concentrations vs. time.

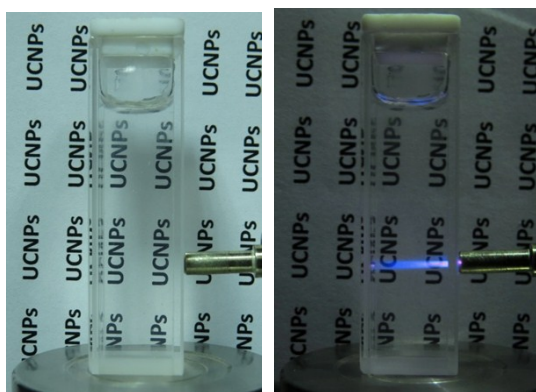

Fig. **SI-1.1**. A cuvette with UCNPs-PMAO in PBS buffer, pH 7.0, exhibiting high transparency of the solution (left) and uniform blue emission at the 975 nm excitation laser beam (right). UCNP concentration is 0.5 mg/ml.

**Supplementary Information 2 (SI-2).** Viability of human dermal fibroblasts incubated with the obtained UCNP probes at the 0.1 mg/ml concentration of NPs for 24 h at 37 °C (Fig.SI-2).

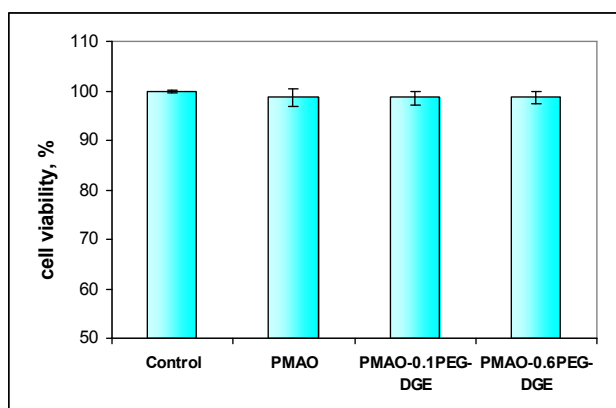

Fig. **SI-2**. Cell viability of fibroblasts after incubation with UCNPs modified with PMAO and with PMAO followed by PEG-DGE cross-linking at 0.1 and 0.6 mg/ml concentrations.
